# Supplementary material
Source: PubMed Central journal article supplement (PMC4702607)
Supplement: MCB.00534-15_zmb999101054so3.pdf [file MCB.00534-15_zmb999101054so3.pdf]

**Table S3. Primer sequences used in the study.**

RT-qPCR primers:

|           |                       |
|-----------|-----------------------|
| BDNFRTF   | CAGTACAGTGGTTCTACAATC |
| BDNFRTR   | CAATTCACAATTAAGCAGC   |
| KCNA1RTF  | AGGCTCAGTTGCTCCATGTT  |
| KCNA1RTR  | TCAGCTGTGGTGCAGTTACC  |
| PCDH17RTF | CCACGTTTAAGGACCCAGAA  |
| PCDH17RTR | TCAGAATGACCAAGCACTCG  |
| junbF     | TTTTGTCAAAGCCCTGGACG  |
| junbR     | GGGGAGTAACTGCTGAGGTT  |
| nr4a1F    | GTTATCCGAAAGTGGGCAGA  |
| nr4a1R    | AGTACCAGGCCTGAGCAGAA  |

ChIP-qPCR primers

|              |                          |
|--------------|--------------------------|
| bdnfivchipF  | AGCCCTCCAGAACCTAGTCA     |
| bdnfivchipR  | CAGAAGCCAAGCCTGTCATTA    |
| gap43ncchipF | AGAAAGGACCAAAGGGAGGA     |
| gap43ncchipR | GAGGTAGCGGAGGACAGAGA     |
| Arcchip1F    | GAGGAGCTTAGCGAGTGTGG     |
| Arcchip1R    | AGCATAAATAGCCGCTGGTG     |
| nr4a1chip1F  | GAGGGGAGGAGATCCTGTTC     |
| nr4a1chip1R  | TCCAGACCCACTAGGCTCAC     |
| kcna1chip1F  | TAGATGCTCACGAGCGTTGT     |
| kcna1chip1R  | CCCCTCTTCCACCTGTGAGT     |
| pcdh17chip1F | TGTCGCAATCAAATACTCACC    |
| pcdh17chip1R | CACAAACATCCACAAGTTACGA   |
| gap43chipF   | GCCCCACTTCCCTAAAACATGTTC |
| gap43chipR   | CACCTCCAATCTGGACCCAATTAC |

|              |                       |
|--------------|-----------------------|
| DbichipF     | CCGACTAGAAAATGGGATGC  |
| DbichipR     | GGTGCAGGACCGACAAGTAT  |
| Stmn2ChipF   | TTTCTCATCTTCCTGCTCAAG |
| Stmn2ChipR   | GCTCTGCACTTCCGGTTACT  |
| Camk4ChipF   | TTAGCGCAAATTGGATGTGA  |
| Camk4ChipR   | ACTGCCATGGCGATTTTAAG  |
| Kcnj8ChipF   | TGTTGGTCCTCCAGAACTGA  |
| Kcnj8ChipR   | CACCTCTATCCCCAGCTCCT  |
| Unc13cChipF  | CAAGTCCACATTCTTCCCATT |
| Unc13cChipR  | CCTTCTGTGAGCATTTCAACT |
| Sh3kbp1ChipF | GACCCCTAAATCTCCTCCA   |
| Sh3kbp1ChipR | GGCTCGTCCTCTGTCTGC    |
| Gap43ChipF   | GCGCAGTTGATAATCATGGA  |
| Gap43ChipR   | GCTTGACTGCTGTGTGTGTG  |
| Slc17a6chipF | TAGCTTCCTCTGTCCGTGGT  |
| Slc17a6chipR | GCAGAGTGGCAGAGTGGAAT  |
| sec1chipF    | AAAGGCTCATGTCTTGTGGAA |
| sec1chipR    | CACGGGAGTCCTTTCCTTC   |
| Cntn5chipF   | TCGCAGAGTTCTGAGTCCTTC |
| Cntn5chipR   | ACCTGCCTGCATCTCTCAAC  |

|             |                           |
|-------------|---------------------------|
| Ppfa1chipF  | GCTAGATCCGCGGTAGTGG       |
| Ppfa1chipR  | CCTGCCAGAGATCTTTACCG      |
| Dlgap1chipF | CAGGAAGGAGAGGGTGTTGA      |
| Dlgap1chipR | AAACAGTGCTGAGTGGCAGA      |
| SyplchipF   | CAAAGGCCGGAAAAGAGTC       |
| SyplchipR   | AACCATGTTGGCTTTGGAAG      |
| Sntb2chipF  | GAGAACCAAAGCAAAGGACG      |
| Sntb2chipR  | GGCGATTCATTATTCATGAGG     |
| Arr3ChipF   | GGAAGCTGCTTAGAGCATGG      |
| Arr3ChipR   | GGCCTAGAGGCAGGTTCTCT      |
| Cacgn3ChipF | GACCCGGCCTTGAGAAGT        |
| Cacgn3ChipR | AAGCTCTCCGCCTGCTCT        |
| cd4chipF    | GCAAGATAGCTAAGCCAAACACATT |
| cd4chipR    | CACCCTACGCTGACATAGTGGTTC  |
